# Supplementary material
Source: HighWire-hosted journal article supplement (https://rc.rcjournal.com/highwire/filestream/11935/field_highwire_adjunct_files/0/RC-0854.R2_Perez-Granda_Suppl.pdf)
Supplement: RC-0854.R2_Perez-Granda_Suppl.pdf [file RC-0854.R2_Perez-Granda_Suppl.pdf]

| Questions                                                                                                                 | Answer                                                                                                                                                                                                            |
|---------------------------------------------------------------------------------------------------------------------------|-------------------------------------------------------------------------------------------------------------------------------------------------------------------------------------------------------------------|
| Q1. How do you value the need to have written guidelines for the prevention of VAP in your unit?                          | <ol style="list-style-type: none"> <li>1. Not needed</li> <li>2. Highly needed or needed</li> <li>3. Contraindicated</li> <li>4. I do not know</li> <li>5. Indifferent</li> </ol>                                 |
| Q2. Evolution of VAP in the ICU must be recorded as ...                                                                   | <ol style="list-style-type: none"> <li>1. incidence and incidence density</li> <li>2. Prevalence</li> <li>3. Surveillance is contraindicated</li> <li>4. Not necessary</li> <li>5. I do not know</li> </ol>       |
| Q3. The semi-recumbent position for the prevention of VAP is considered ...                                               | <ol style="list-style-type: none"> <li>1. Indifferent</li> <li>2. Not recommended</li> <li>3. Highly recommended or recommended.</li> <li>4. There is no evidence of efficacy</li> <li>5 I do not know</li> </ol> |
| Q4. What is the most recommended procedure for oral hygiene to prevent VAP?                                               | <ol style="list-style-type: none"> <li>1. Bicarbonate</li> <li>2. Not necessary</li> <li>3. Chlorhexidine 0.12%</li> <li>4. Indifferent</li> <li>5 I do not know</li> </ol>                                       |
| Q5. What is your opinion regarding respiratory physiotherapy for the prevention of VAP?                                   | <ol style="list-style-type: none"> <li>1. There is no evidence of efficacy</li> <li>2. Highly recommended</li> <li>3. Not recommended</li> <li>4. Indifferent</li> <li>5. I do not know</li> </ol>                |
| Q6. Barrier measures (hand hygiene and gloves) before tracheal suctioning and manipulation of ventilator circuits are ... | <ol style="list-style-type: none"> <li>1. Indifferent</li> <li>2. Not recommended</li> <li>3. Highly recommended</li> <li>4. Recommended</li> <li>5. I do not know</li> </ol>                                     |
| Q7. The recommendation for subglottic aspiration of respiratory secretions is ...                                         | <ol style="list-style-type: none"> <li>1. Highly recommended or recommended</li> <li>2. Contraindicated</li> <li>3. There is no evidence of efficacy</li> <li>4. Indifferent</li> <li>5. I do not know</li> </ol> |
| Q8. When should ventilator-circuits be changed?                                                                           | <ol style="list-style-type: none"> <li>1. Weekly</li> <li>2. When soiled or dirty or after each patient</li> <li>3. Every 48 hours</li> <li>4. Daily</li> <li>5. I do not know</li> </ol>                         |
| Q9. Control and maintenance of pressure of the tracheal balloon in patients undergoing subglottic aspiration is ...       | <ol style="list-style-type: none"> <li>1. Contraindicated</li> <li>2. There is no evidence of efficacy</li> <li>3. Indifferent</li> <li>4. Highly recommended or recommended</li> <li>5. I do not know</li> </ol> |
| Q10. Selective digestive decontamination with antibiotics is...                                                           | <ol style="list-style-type: none"> <li>1. Highly recommended</li> <li>2. Not generally recommended at present</li> <li>3. Indifferent</li> <li>4. Contraindicated</li> <li>5. I do not know</li> </ol>            |
